# Supplementary material for: The miR-378c-Samd1 circuit promotes phenotypic modulation of vascular smooth muscle cells and foam cells formation in atherosclerosis lesions
Source: PubMed Central journal article supplement (PMC8131603; doi:10.1038/s41598-021-89981-z), 2021-05-18
Supplement: 41598_2021_89981_MOESM4_ESM.pdf [file 41598_2021_89981_MOESM4_ESM.pdf]

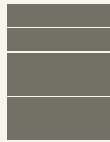

| #  | Template                 | Alignment Coverage | 3D Model | Confidence | % i.d. | Template Information                                                                                                                                                                                                                                                                                                                        |
|----|--------------------------|--------------------|----------|------------|--------|---------------------------------------------------------------------------------------------------------------------------------------------------------------------------------------------------------------------------------------------------------------------------------------------------------------------------------------------|
| 1  | <a href="#">c4pzoE_</a>  | <br>Alignment      |          | 99.8       | 36     | <b>PDB header:</b> dna binding protein<br><b>Chain:</b> E: <b>PDB Molecule:</b> polyhomeotic-like protein 3;<br><b>PDBTitle:</b> crystal structure of phc3 sam I967r                                                                                                                                                                        |
| 2  | <a href="#">c1pk1B_</a>  | <br>Alignment      |          | 99.8       | 35     | <b>PDB header:</b> transcription repression<br><b>Chain:</b> B: <b>PDB Molecule:</b> sex comb on midleg cg9495-pa;<br><b>PDBTitle:</b> hetero sam domain structure of ph and scm.                                                                                                                                                           |
| 3  | <a href="#">c5j8yC_</a>  | <br>Alignment      |          | 99.8       | 29     | <b>PDB header:</b> nuclear protein<br><b>Chain:</b> C: <b>PDB Molecule:</b> polycomb protein sfmbt;<br><b>PDBTitle:</b> crystal structure of the scm-sam and sfmbt-sam heterodimer                                                                                                                                                          |
| 4  | <a href="#">d1pk3a1</a>  | <br>Alignment      |          | 99.8       | 34     | <b>Fold:</b> SAM domain-like<br><b>Superfamily:</b> SAM/Pointed domain<br><b>Family:</b> SAM (sterile alpha motif) domain                                                                                                                                                                                                                   |
| 5  | <a href="#">c1pk1A_</a>  | <br>Alignment      |          | 99.7       | 31     | <b>PDB header:</b> transcription repression<br><b>Chain:</b> A: <b>PDB Molecule:</b> polyhomeotic-proximal chromatin protein;<br><b>PDBTitle:</b> hetero sam domain structure of ph and scm.                                                                                                                                                |
| 6  | <a href="#">d1pk1c1</a>  | <br>Alignment      |          | 99.7       | 32     | <b>Fold:</b> SAM domain-like<br><b>Superfamily:</b> SAM/Pointed domain<br><b>Family:</b> SAM (sterile alpha motif) domain                                                                                                                                                                                                                   |
| 7  | <a href="#">d1kw4a_</a>  | <br>Alignment      |          | 99.7       | 31     | <b>Fold:</b> SAM domain-like<br><b>Superfamily:</b> SAM/Pointed domain<br><b>Family:</b> SAM (sterile alpha motif) domain                                                                                                                                                                                                                   |
| 8  | <a href="#">c2dkzA_</a>  | <br>Alignment      |          | 99.7       | 17     | <b>PDB header:</b> signaling protein<br><b>Chain:</b> A: <b>PDB Molecule:</b> hypothetical protein loc64762;<br><b>PDBTitle:</b> solution structure of the sam_pnt-domain of the2 hypothetical protein loc64762                                                                                                                             |
| 9  | <a href="#">c2e8oA_</a>  | <br>Alignment      |          | 99.7       | 19     | <b>PDB header:</b> signaling protein<br><b>Chain:</b> A: <b>PDB Molecule:</b> sam domain and hd domain-containing protein 1;<br><b>PDBTitle:</b> solution structure of the n-terminal sam-domain of the sam2 domain and hd domain containing protein 1 (dendritic cell-3 derived ifng-induced protein) (dcip) (monocyte protein 5)4 (mop-5) |
| 10 | <a href="#">d1luqva_</a> | <br>Alignment      |          | 99.6       | 19     | <b>Fold:</b> SAM domain-like<br><b>Superfamily:</b> SAM/Pointed domain<br><b>Family:</b> SAM (sterile alpha motif) domain                                                                                                                                                                                                                   |
| 11 | <a href="#">d1wwva1</a>  | <br>Alignment      |          | 99.5       | 19     | <b>Fold:</b> SAM domain-like<br><b>Superfamily:</b> SAM/Pointed domain<br><b>Family:</b> SAM (sterile alpha motif) domain                                                                                                                                                                                                                   |

|    |                         |           |              |      |    |                                                                                                                                                                                                                                                                                    |
|----|-------------------------|-----------|--------------|------|----|------------------------------------------------------------------------------------------------------------------------------------------------------------------------------------------------------------------------------------------------------------------------------------|
| 12 | <a href="#">c1v85A_</a> | Alignment |              | 99.5 | 16 | <b>PDB header:</b> apoptosis<br><b>Chain:</b> A; <b>PDB Molecule:</b> similar to ring finger protein 36;<br><b>PDBTitle:</b> sterile alpha motif (sam) domain of mouse bifunctional2 apoptosis regulator                                                                           |
| 13 | <a href="#">c2eanA_</a> | Alignment |              | 99.5 | 22 | <b>PDB header:</b> signaling protein<br><b>Chain:</b> A; <b>PDB Molecule:</b> connector enhancer of kinase suppressor of ras 2;<br><b>PDBTitle:</b> solution structure of the n-terminal sam-domain of human2 kiaa0902 protein (connector enhancer of kinase suppressor3 of ras 2) |
| 14 | <a href="#">c3bs5A_</a> | Alignment |              | 99.5 | 19 | <b>PDB header:</b> signaling protein/membrane protein<br><b>Chain:</b> A; <b>PDB Molecule:</b> protein aveugle;<br><b>PDBTitle:</b> crystal structure of hcnk2-sam/dhyp-sam complex                                                                                                |
| 15 | <a href="#">c3bq7A_</a> | Alignment |              | 99.5 | 21 | <b>PDB header:</b> transferase<br><b>Chain:</b> A; <b>PDB Molecule:</b> diacylglycerol kinase delta;<br><b>PDBTitle:</b> sam domain of diacylglycerol kinase delta1 (e35g)                                                                                                         |
| 16 | <a href="#">c2gleA_</a> | Alignment |              | 99.5 | 17 | <b>PDB header:</b> protein binding<br><b>Chain:</b> A; <b>PDB Molecule:</b> neurabin-1;<br><b>PDBTitle:</b> solution structure of neurabin sam domain                                                                                                                              |
| 17 | <a href="#">c6qwvN_</a> | Alignment |              | 99.5 | 17 | <b>PDB header:</b> apoptosis<br><b>Chain:</b> N; <b>PDB Molecule:</b> sterile alpha and tir motif-containing protein 1;<br><b>PDBTitle:</b> sarm1 sam1-2 domains                                                                                                                   |
| 18 | <a href="#">d2f3na1</a> | Alignment |              | 99.4 | 22 | <b>Fold:</b> SAM domain-like<br><b>Superfamily:</b> SAM/Pointed domain<br><b>Family:</b> SAM (sterile alpha motif) domain                                                                                                                                                          |
| 19 | <a href="#">c3bs7A_</a> | Alignment |              | 99.4 | 19 | <b>PDB header:</b> signaling protein<br><b>Chain:</b> A; <b>PDB Molecule:</b> protein aveugle;<br><b>PDBTitle:</b> crystal structure of the sterile alpha motif (sam) domain2 of hyphen/aveugle                                                                                    |
| 20 | <a href="#">c2l5yA_</a> | Alignment |              | 99.4 | 20 | <b>PDB header:</b> signaling protein<br><b>Chain:</b> A; <b>PDB Molecule:</b> stromal interaction molecule 2;<br><b>PDBTitle:</b> nmr structure of calcium-loaded stim2 ef-sam.                                                                                                    |
| 21 | <a href="#">c5f3xB_</a> | Alignment | not modelled | 99.3 | 23 | <b>PDB header:</b> structural protein/protein binding<br><b>Chain:</b> B; <b>PDB Molecule:</b> ankyrin repeat and sam domain-containing protein 4b;<br><b>PDBTitle:</b> crystal structure of harmonin npdz1 in complex with anks4b sam-pbm                                         |
| 22 | <a href="#">c6pw7B_</a> | Alignment | not modelled | 99.3 | 24 | <b>PDB header:</b> signaling protein<br><b>Chain:</b> B; <b>PDB Molecule:</b> stromal interaction molecule 1;<br><b>PDBTitle:</b> x-ray crystal structure of c. elegans stim ef-sam domain                                                                                         |
| 23 | <a href="#">c3k1rB_</a> | Alignment | not modelled | 99.3 | 24 | <b>PDB header:</b> structural protein<br><b>Chain:</b> B; <b>PDB Molecule:</b> usher syndrome type-1g protein;<br><b>PDBTitle:</b> structure of harmonin npdz1 in complex with the sam-pbm of2 sans                                                                                |
| 24 | <a href="#">c2k60A_</a> | Alignment | not modelled | 99.3 | 20 | <b>PDB header:</b> signaling protein<br><b>Chain:</b> A; <b>PDB Molecule:</b> protein (stromal interaction molecule 1);<br><b>PDBTitle:</b> nmr structure of calcium-loaded stim1 ef-sam                                                                                           |
| 25 | <a href="#">c2eaoA_</a> | Alignment | not modelled | 99.3 | 16 | <b>PDB header:</b> signaling protein, transferase<br><b>Chain:</b> A; <b>PDB Molecule:</b> ephrin type-b receptor 1;<br><b>PDBTitle:</b> solution structure of the c-terminal sam-domain of mouse2 ephrin type-b receptor 1 precursor (ec 2.7.1.112)                               |
| 26 | <a href="#">c6kr4H_</a> | Alignment | not modelled | 99.3 | 15 | <b>PDB header:</b> transferase/protein binding<br><b>Chain:</b> H; <b>PDB Molecule:</b> liprin-alpha-3;<br><b>PDBTitle:</b> crystal structure of the liprin-alpha3_sam123/lar_d1d2 complex                                                                                         |
| 27 | <a href="#">c3tadB_</a> | Alignment | not modelled | 99.3 | 13 | <b>PDB header:</b> protein binding<br><b>Chain:</b> B; <b>PDB Molecule:</b> liprin-alpha-2;<br><b>PDBTitle:</b> crystal structure of the liprin-alpha/liprin-beta complex                                                                                                          |
| 28 | <a href="#">c5itiA_</a> | Alignment | not modelled | 99.2 | 17 | <b>PDB header:</b> signaling protein<br><b>Chain:</b> A; <b>PDB Molecule:</b> tankyrase-1;<br><b>PDBTitle:</b> crystal structure of the human tankyrase 1 (tnks) sam domain (d1055r),2 crystal form 2                                                                              |
